# Supplementary material for: Diversity of pollinator communities along urban environmental gradients in Merida, Yucatan, a tropical city in Mexico
Source: Research Square preprint supplement (doi:10.21203/rs.3.rs-8329681/v1), 2025-12-22
Supplement: Supplementary file 1 [file 46c790c7865856edaed4f1ee.xlsx]

## Sheet: We
Diversity of pollinator communities along urban environmental gradients in Merida, Yucatan, a tropical city in Mexico.
Urban Ecosystems
Sebastián Gay Escalante (1), Richard Evan Feldman (2), Rosalina Rodríguez (1), Azucena Canto (1) *Corresponding author: azucanto@cicy.mx
(1) Centro de Investigación Científica de Yucatan A.C., 130 calle 43 Chuburna de Hidalgo, Merida 97205, Yucatan, Mexico.
(2) Ministry of Natural Resources and Forestry, 2140 East Bank Drive Peterborough K9H 3X7, Ontario Canada.

## Sheet: Ground_cover_complexity
Percentages of ground types registered in a 1m x 1m square.
SITE	Clay	Sand	Rocks	Vegetation	Leaf litter	Logs	Impervious s.	Debris
JBRRO	4	0	39	7	50	0	0	0
JBRRO	0	0	6	5	89	0	0	0
JBRRO	0	0	90	1	9	0	0	0
JBRRO	0	0	58	4	38	0	0	0
JBRRO	0	0	70	6	24	0	0	0
JBRRO	0	0	1	17	82	0	0	0
JBRRO	0	0	52	0	40	8	0	0
JBRRO	0	0	15	18	67	0	0	0
JBRRO	10	0	74	1	15	0	0	0
JBRRO	0	0	0	6	94	0	0	0
JBRRO	0	0	21	2	77	0	0	0
JBRRO	8	0	0	11	81	0	0	0
JBRRO	63	0	2	8	27	0	0	0
JBRRO	20	0	21	15	44	0	0	0
JBRRO	6	0	83	11	0	0	0	0
JBRRO	0	0	99	1	0	0	0	0			Fig. 4 Stacked bar plot showing the pixel percentage by ground cover type of the urban natural areas studied.
JBRRO	84	0	12	4	0	0	0	0
JBRRO	13	0	87	0	0	0	0	0
JBRRO	12	0	88	0	0	0	0	0
JBRRO	36	0	1	0	63	0	0	0
JBRRO	0	0	100	0	0	0	0	0
JBRRO	0	0	50		25	25	0	0
JBRRO	0	0	100	0	0	0	0	0
JBRRO	0	0	0	43	42	15	0	0
JBRRO	0	0	0	15	85	0	0	0
JBRRO	0	0	0	5	59	36	0	0
JBRRO	0	0	0	26	74	0	0	0
JBRRO	0	0	0	46	54	0	0	0
JBRRO	0	0	2	14	61	23	0	0
JBRRO	0	0	0	3	61	36	0	0
JBRRO	0	0	50	22	22	6	0	0
JBRRO	0	0	20	10	66	4	0	0
JBRRO	0	0	40	10	46	4	0	0
JBRRO	0	0	0	16	84	0	0	0
JBRRO	0	0	0	7	71	22	0	0
JBRRO	0	0	20	14	66	0	0	0
JBRRO	0	0	22	56	22	0	0	0
JBRRO	0	0	40	14	46	0	0	0
JBRRO	0	0	51	18	31	0	0	0
JBRRO	0	0	23	14	63	0	0	0
LHR	0	0	0	26	17	17	40	0
LHR	0	0	0	0	2	1	97	0
LHR	0	0	0	0	10	0	90	0
LHR	0	0	0	45	48	7	0	0
LHR	0	0	0	58	13	9	20	0
LHR	0	0	4	84	0	12	0	0
LHR	0	0	0	0	21	0	79	0
LHR	0	0	0	0	0	0	100	0
LHR	0	0	0	20	70	0	10	0
LHR	0	0	6	83	0	1	10	0
LHR	0	0	0	0	0	0	100	0
LHR	0	0	0	0	0	0	100	0
LHR	0	0	2	81	2	14	0	1
LHR	0	0	0	35	3	62	0	0
LHR	0	0	0	0	25	5	70	0
LHR	0	0	0	0	0	0	100	0
LHR	0	0	2	18	16	7	57	0
LHR	0	0	0	15	70	0	15	0
LHR	0	0	0	0	0	0	100	0
LHR	0	0	0	0	0	0	100	0
LHR	0	0	0	100	0	0	0	0
LHR	0	0	74	26	0	0	0	0
LHR	2	0	52	38	0	8	0	0
LHR	0	0	15	47	10	8	0	20
LHR	0	0	27	73	0	0	0	0
LHR	0	0	4	96	0	0	0	0
LHR	0	0	62	35	0	3	0	0
LHR	0	0	22	46	32	0	0	0
LHR	0	0	0	99	0	1	0	0
LHR	0	0	0	100	0	0	0	0
LHR	0	0	45	55	0	0	0	0
LHR	0	0	40	36	0	24	0	0
LHR	0	0	0	93	0	7	0	0
LHR	0	0	0	99	0	0	0	1
LHR	0	0	25	75	0	0	0	0
LHR	0	0	0	100	0	0	0	0
LHR	0	0	6	94	0	0	0	0
LHR	0	0	24	66	0	10	0	0
LHR	0	0	35	58	0	7	0	0
LHR	0	0	21	70	0	9	0	0
MAPSA	0	63	2	0	35	0	0	0
MAPSA	0	83	2	0	15	0	0	0
MAPSA	0	8	11	81	0	0	0	0
MAPSA	0	32	63	0	0	5	0	0
MAPSA	0	25	18	2	55	0	0	0
MAPSA	0	0	0	82	18	0	0	0
MAPSA	0	14	15	71	0	0	0	0
MAPSA	0	62	15	0	23	0	0	0
MAPSA	0	4	0	80	16	0	0	0
MAPSA	0	35	5	2	58	0	0	0
MAPSA	0	50	0	7	43	0	0	0
MAPSA	0	79	3	18	0	0	0	0
MAPSA	0	1	3	10	86	0	0	0
MAPSA	0	0	0	78	22	0	0	0
MAPSA	0	90	0	0	10	0	0	0
MAPSA	0	76	24	0	0	0	0	0
MAPSA	0	0	0	11	89	0	0	0
MAPSA	0	0	1	9	90	0	0	0
MAPSA	0	44	12	4	30	10	0	0
MAPSA	0	60	25	0	15	0	0	0
MAPSA	0	0	0	22	70	8	0	0
MAPSA	0	0	69	7	24	0	0	0
MAPSA	0	0	0	40	60	0	0	0
MAPSA	0	0	0	30	55	15	0	0
MAPSA	0	0	40	2	58	0	0	0
MAPSA	0	0	40	12	48	0	0	0
MAPSA	0	0	42	28	30	0	0	0
MAPSA	0	0	0	15	75	10	0	0
MAPSA	0	0	0	8	52	40	0	0
MAPSA	0	0	0	46	39	15	0	0
MAPSA	0	0	0	11	89	0	0	0
MAPSA	0	0	0	30	45	25	0	0
MAPSA	0	0	0	7	83	10	0	0
MAPSA	60	0	0	24	16	0	0	0
MAPSA	0	0	0	12	46	42	0	0
MAPSA	0	0	0	13	27	60	0	0
MAPSA	0	10	5	9	76	0	0	0
MAPSA	0	0	0	11	77	12	0	0
MAPSA	0	0	0	42	52	6	0	0
MAPSA	0	0	0	15	40	45	0	0
PCTY	4	0		96	0	0	0	0
PCTY	0	0	14	53	30	3	0	0
PCTY	0	0	5	79	12	4	0	0
PCTY	0	0	16	70	11	3	0	0
PCTY	0	0	0	100	0	0	0	0
PCTY	0	0	5	79	16	0	0	0
PCTY	0	0	20	80	0	0	0	0
PCTY	3	0	13	84	0	0	0	0
PCTY	0	0	0	100	0	0	0	0
PCTY	0	0	0	95	5	0	0	0
PCTY	0	0	0	47	3	0	50	0
PCTY	0	0	0	77	0	0	23	0
PCTY	0	0	0	0	0	0	100	0
PCTY	0	0	0	0	0	0	100	0
PCTY	0	0	0	0	0	0	100	0
PCTY	0	0	20	70	10	0	0	0
PCTY	0	0	0	0	0	0	100	0
PCTY	0	0	0	0	0	0	100	0
PCTY	0	0	4	88	8	0	0	0
PCTY	0	0	41	41	0	0	18	0
PCTY	0	0	0	83	0	0	17	0
PCTY	0	0	0	0	0	0	100	0
PCTY	0	0	13	42	0	0	45	0
PCTY	0	0	1	0	69	0	30	0
PCTY	0	0	9	91	0	0	0	0
PCTY	0	0	0	1	0	0	99	0
PCTY	0	0	0	2	0	0	98	0
PCTY	0	0	0	12	0	0	88	0
PCTY	0	0	1	91	8	0	0	0
PCTY	0	0	0	80	20	0	0	0
PCTY	0	0	0	0	0	0	100	0
PCTY	0	0	0	0	0	0	100	0
PCTY	0	0	7	9	64	0	20	0
PCTY	0	0	0	10	75	0	15	0
PCTY	0	0	0	0	0	0	100	0
PCTY	0	0	0	0	0	0	100	0
PCTY	0	0	0	0	11	0	89	0
PCTY	0	0	0	0	0	0	100	0
PCTY	0	0	0	16	74	0	10	0
PCTY	0	0	0	0	0	0	100	0
DYX	6	0	18	61	12	3	0	0
DYX	6	0	10	68	13	3	0	0
DYX	0	0	22	70	8	0	0	0
DYX	14	0	50	20	16	0	0	0
DYX	0	0	45	35	14	6	0	0
DYX	49	0	17	29	5	0	0	0
DYX	3	0	12	82	3	0	0	0
DYX	0	0	18	76	6	0	0	0
DYX	10	0	5	80	5	0	0	0
DYX	3	0	20	55	12	10	0	0
DYX	15	0	12	57	6	10	0	0
DYX	8	0	3	74	15	0	0	0
DYX	0	0	12	40	40	3	5	0
DYX	3	0	6	43	48	0	0	0
DYX	0	0	0	0	100	0	0	0
DYX	0	0	15	61	19	0	5	0
DYX	5	0	0	90	0	0	5	0
DYX	2	0	0	31	60	7	0	0
DYX	10	0	0	50	25	0	15	0
DYX	0	0	20	70	5	0	5	0
DYX	0	0	1	63	25	11	0	0
DYX	0	0	0	100	0	0	0	0
DYX	0	0	20	12	64	4	0	0
DYX	0	0	12	81	7	0	0	0
DYX	0	0	0	100	0	0	0	0
DYX	0	0	6	18	4	64	0	8
DYX	2	0	0	50	25	8	0	15
DYX	0	0	0	72	28	0	0	0
DYX	0	0	0	100	0	0	0	0
DYX	2	0	6	9	40	13	0	30
DYX	0	0	16	11	35	38	0	0
DYX	0	0	40	50	10	0	0	0
DYX	8	0	14	52	15	11	0	0
DYX	30	0	0	28	40	0	0	2
DYX	0	0	0	65	9	26	0	0
DYX	54	0	0	20	16	0	10	0
DYX	0	0	5	85	10	0	0	0
DYX	0	0	45	48	7	0	0	0
DYX	0	0	70	19	11	0	0	0
DYX	3	0	0	0	0	81	12	4
TIX	0	60	14	1	0	0	25	0
TIX	0	0	83	7	0	0	10	0
TIX	32	0	6	23	30	9	0	0
TIX	5	63	11	15	6	0	0	0
TIX	0	0	3	47	12	38	0	0
TIX	0	0	75	20	5	0	0	0
TIX	0	0	51	44	0	0	4	1
TIX	0	0	5	85	8	2	0	0
TIX	0	0	4	25	53	8	10	0
TIX	0	4	21	75	0	0	0	0
TIX	0	0	7	93	0	0	0	0
TIX	0	0	8	32	0	60	0	0
TIX	0	0	10	80	10	0	0	0
TIX	6	0	4	88	0	2	0	0
TIX	2	0	90	8	0	0	0	0
TIX	40	0	30	25	5	0	0	0
TIX	30	0	9	59	0	2	0	0
TIX	0	0	0	100	0	0	0	0
TIX	0	0	11	30	5	54	0	0
TIX	16	0	61	23	0	0	0	0
TIX	10	0	0	90	0	0	0	0
TIX	4	0	4	92	0	0	0	0
TIX	0	0	0	0	0	0	100	0
TIX	0	0	0	0	0	0	100	0
TIX	2	0	65	29	2	0	0	2
TIX	6	5	0	72	6	0	10	1
TIX	0	0	0	0	0	0	100	0
TIX	0	0	0	0	0	0	100	0
TIX	2	0	3	82	8	5	0	0
TIX	0	16	2	74	2	0	0	6
TIX	0	0	0	0	0	0	100	0
TIX	0	0	0	0	0	0	100	0
TIX	0	0	0	70	5	0	20	5
TIX	12	0	5	61	22	0	0	0
TIX	0	0	0	0	0	0	100	0
TIX	0	0	0	4	5	0	91	0
TIX	0	0	0	100	0	0	0	0
TIX	4	0	0	87	0	0	8	1
TIX	0	0	0	0	0	0	100	0
TIX	0	27	0	40	30	3	0	0
ARQ	15	0	0	10	40	35	0	0
ARQ	5	0	8	40	47	0	0	0
ARQ	0	0	36	45	10	8	0	1
ARQ	47	0	0	3	47	0	0	3
ARQ	0	0	17	19	47	17	0	0
ARQ	0	0	12	5	75	8	0	0
ARQ	0	0	0	32	45	23	0	0
ARQ	0	0	8	36	37	19	0	0
ARQ	0	0	2	11	75	12	0	0
ARQ	0	0	1	30	39	30	0	0
ARQ	0	0	0	32	54	9	0	5
ARQ	0	0	8	40	48	4	0	0
ARQ	0	0	3	80	0	17	0	0
ARQ	0	0	13	30	22	35	0	0
ARQ	5	5	10	80	0	0	0	0
ARQ	0	0	4	10	86	0	0	0
ARQ	5	0	3	80	12	0	0	0
ARQ	0	0	8	85	2	5	0	0
ARQ	25	0	0	75	0	0	0	0
ARQ	0	0	0	100	0	0	0	0
ARQ	0	0	18	7	72	3	0	0
ARQ	0	0	1	16	70	13	0	0
ARQ	0	0	12	4	83	1	0	0
ARQ	0	0	8	0	86	6	0	0
ARQ	0	0	6	8	86	0	0	0
ARQ	0	0	1	9	75	0	15	0
ARQ	0	0	2	5	93	0	0	0
ARQ	0	0	10	17	50	3	20	0
ARQ	0	0	10	60	27	3	0	0
ARQ	0	0	4	50	30	16	0	0
ARQ	0	0	0	7	93	0	0	0
ARQ	0	0	39	22	38	1	0	0
ARQ	0	0	23	67	10	0	0	0
ARQ	0	0	2	73	24	0	0	1
ARQ	7	0	2	91	0	0	0	0
ARQ	0	0	1	99	0	0	0	0
ARQ	0	0	0	100	0	0	0	0
ARQ	4	0	0	89	2	5	0	0
ARQ	5	0	11	82	2	0	0	0
ARQ	0	0	0	97	0	3	0	0
LIB	15	0	0	12	15	25	33	0
LIB	22	0	0	40	28	7	0	3
LIB	27	0	0	25	18	30	0	0
LIB	0	0	0	85	0	0	15	0
LIB	0	0	0	72	23	5	0	0
LIB	0	0	0	10	76	2	12	0
LIB	0	0	0	55	40	5	0	0
LIB	30	0	0	39	21	10	0	0
LIB	10	0	7	63	15	5	0	0
LIB	55	0	0	12	28	5	0	0
LIB	20	0	9	21	23	27	0	0
LIB	12	0	5	23	47	13	0	0
LIB	15	0	0	20	15	50	0	0
LIB	15	0	40	15	5	25	0	0
LIB	0	0	0	100	0	0	0	0
LIB	0	43	15	25	0	0	17	0
LIB	0	0	0	5	95	0	0	0
LIB	0	0	0	0	0	0	100	0
LIB	0	0	0	40	35	3	22	0
LIB	0	0	0	18	82	0	0	0
LIB	0	0	0	13	7	80	0	0
LIB	0	0	45	20	0	5	30	0
LIB	5	0	0	10	45	40	0	0
LIB	44	0	21	14	15	5	0	1
LIB	33	0	0	15	15	37	0	0
LIB	5	0	0	10	0	85	0	0
LIB	77	0	0	10	0	0	13	0
LIB	13	0	0	20	17	50	0	0
LIB	20	0	0	80	0	0	0	0
LIB	0	0	5	64	11	11	9	0
LIB	0	0	14	66	10	10	0	0
LIB	50	0	0	50	0	0	0	0
LIB	0	0	0	100	0	0	0	0
LIB	20	0	7	73	0	0	0	0
LIB	20	0	0	80	0	0	0	0
LIB	0	0	0	100	0	0	0	0
LIB	50	0	25	0	25	0	0	0
LIB	52	0	0	18	13	17	0	0
LIB	15	0	80	5	0	0	0	0
LIB	0	0	90	2	3	5	0	0
DZB	0	0	0	19	77	4	0	0
DZB	0	0	5	42	20	20	0	13
DZB	0	0	0	38	62	0	0	0
DZB	0	0	0	19	64	17	0	0
DZB	0	0	23	60	17	0	0	0
DZB	0	0	0	50	50	0	0	0
DZB	0	0	0	40	52	6	0	2
DZB	0	0	9	57	26	8	0	0
DZB	0	0	1	60	24	15	0	0
DZB	0	0	0	84	10	6	0	0
DZB	0	0	35	55	3	7	0	0
DZB	0	0	10	57	33	0	0	0
DZB	0	0	15	85	0	0	0	0
DZB	0	0	2	98	0	0	0	0
DZB	0	0	0	100	0	0	0	0
DZB	0	0	0	100	0	0	0	0
DZB	0	0	0	100	0	0	0	0
DZB	0	0	0	84	0	0	16	0
DZB	0	0	0	0	0	0	100	0
DZB	0	0	0	2	0	0	98	0
DZB	0	0	4	72	22	0	0	2
DZB	0	0	6	85	5	0	0	4
DZB	0	0	0	70	0	0	30	0
DZB	0	0	0	82	0	0	18	0
DZB	0	0	0	58	12	0	30	0
DZB	0	0	0	50	29	0	21	0
DZB	0	0	25	15	57	0	0	3
DZB	0	0	0	78	22	0	0	0
DZB	0	0	0	75	25	0	0	0
DZB	0	0	0	69	23	0	8	0
DZB	0	0	5	85	10	0	0	0
DZB	0	0	0	70	21	7	2	0
DZB	0	0	12	88	0	0	0	0
DZB	0	0	8	25	44	20	0	3
DZB	0	0	0	33	52	0	15	0
DZB	0	0	0	59	14	5	22	0
DZB	0	0	0	10	0	20	70	0
DZB	0	0	6	6	58	28	0	2
DZB	0	0	9	9	62	19	0	1
DZB	0	0	0	75	6	0	15	4
LAM	0	0	0	60	0	0	40	0
LAM	0	0	18	28	0	0	54	0
LAM	0	0	0	55	15	0	30	0
LAM	0	0	0	100	0	0	0	0
LAM	0	0	0	60	7	0	33	0
LAM	0	0	0	85	0	0	15	0
LAM	0	0	0	100	0	0	0	0
LAM	0	0	0	66	0	0	34	0
LAM	0	0	0	26	0	0	74	0
LAM	0	0	0	100	0	0	0	0
LAM	0	0	0	88	10	0	0	2
LAM	0	0	0	100	0	0	0	0
LAM	0	0	0	0	0	0	100	0
LAM	0	0	0	93	5	0	2	0
LAM	0	0	0	68	0	0	32	0
LAM	0	0	0	81	0	0	19	0
LAM	0	0	72	10	8	0	10	0
LAM	0	0	0	100	0	0	0	0
LAM	0	0	0	50	0	0	26	24
LAM	0	0	0	15	2	0	83	0
LAM	0	0	0	100	0	0	0	0
LAM	0	0	0	23	77	0	0	0
LAM	0	0	0	36	8	0	0	56
LAM	0	0	0	63	37	0	0	0
LAM	0	0	0	100	0	0	0	0
LAM	0	0	0	0	50	25	25	0
LAM	0	0	17	83	0	0	0	0
LAM	0	0	0	10	10	0	80	0
LAM	0	0	0	100	0	0	0	0
LAM	0	0	10	72	18	0	0	0
LAM	3	0	26	64	7	0	0	0
LAM	0	0	0	0	0	0	100	0
LAM	0	0	0	100	0	0	0	0
LAM	0	0	0	90	0	0	0	10
LAM	0	0	2	88	0	0	10	0
LAM	0	0	0	85	0	0	15	0
LAM	0	0	0	78	0	0	22	0
LAM	0	0	0	81	0	0	19	0
LAM	20	0	1	50	29	0	0	0
LAM	15	0	5	80	0	0	0	0
ITZ	14	0	0	71	15	0	0	0
ITZ	4	0	0	86	6	4	0	0
ITZ	5	0	0	88	7	0	0	0
ITZ	20	0	2	65	13	0	0	0
ITZ	7	0	0	87	6	0	0	0
ITZ	0	0	0	100	0	0	0	0
ITZ	0	0	0	100	0	0	0	0
ITZ	0	0	0	92	8	0	0	0
ITZ	4	0	4	73	3	0	6	10
ITZ	0	0	0	93	2	5	0	0
ITZ	0	0	1	63	26	10	0	0
ITZ	0	0	0	67	4	29	0	0
ITZ	0	0	0	98	2	0	0	0
ITZ	0	0	0	50	50	0	0	0
ITZ	0	0	0	100	0	0	0	0
ITZ	0	0	0	50	0	50	0	0
ITZ	0	0	0	100	0	0	0	0
ITZ	0	0	0	100	0	0	0	0
ITZ	35	0	0	58	7	0	0	0
ITZ	0	0	0	100	0	0	0	0
ITZ	0	0	0	0	0	0	100	0
ITZ	0	0	0	0	0	0	100	0
ITZ	0	0	0	4	0	0	96	0
ITZ	0	0	0	20	0	0	80	0
ITZ	0	0	2	88	0	0	10	0
ITZ	0	0	0	100	0	0	0	0
ITZ	0	0	0	87	13	0	0	0
ITZ	0	0	0	100	0	0	0	0
ITZ	0	0	0	90	8	0	0	2
ITZ	0	58	3	15	20	4	0	0
ITZ	0	0	0	0	0	0	100	0
ITZ	0	0	0	0	0	0	100	0
ITZ	0	0	0	0	0	0	100	0
ITZ	0	0	0	0	0	0	100	0
ITZ	0	0	0	0	0	0	100	0
ITZ	0	0	0	0	0	0	100	0
ITZ	0	0	0	0	0	0	100	0
ITZ	0	0	0	12	0	0	84	4
ITZ	0	0	0	0	0	0	100	0
ITZ	0	0	0	0	0	0	100	0
FDP	5	0	60	20	15	0	0	0
FDP	0	0	19	0	0	0	79	2
FDP	0	0	48	10	22	20	0	0
FDP	0	0	50	50	0	0	0	0
FDP	5	0	85	7	3	0	0	0
FDP	0	0	28	47	0	25	0	0
FDP	0	0	37	21	32	10	0	0
FDP	7	0	86	7	0	0	0	0
FDP	20	0	0	12	50	18	0	0
FDP	30	0	0	23	15	32	0	0
FDP	20	0	20	10	0	50	0	0
FDP	0	0	44	40	10	6	0	0
FDP	0	0	0	0	0	0	100	0
FDP	0	5	0	25	20	0	50	0
FDP	12	0	73	0	8	7	0	0
FDP	0	0	0	0	0	0	100	0
FDP	0	0	0	13	22	0	65	0
FDP	0	0	0	0	100	0	0	0
FDP	0	0	30	12	44	14	0	0
FDP	0	0	0	7	3	0	90	0
FDP	10	0	33	57	0	0	0	0
FDP	5	0	17	73	5	0	0	0
FDP	10	0	19	60	4	7		0
FDP	13	0	7	24	46	5	5	0
FDP	0	0	12	88	0	0	0	0
FDP	3	0	0	20	2	75	0	0
FDP	0	0	66	16	10	8	0	0
FDP	0	0	0	30	70	0	0	0
FDP	5	0	0	55	36	4	0	0
FDP	0	0	10	90	0	0	0	0
FDP	0	0	0	100	0	0	0	0
FDP	0	0	0	28	72	0	0	0
FDP	0	0	6	94	0	0	0	0
FDP	0	0	0	75	25	0	0	0
FDP	0	0	8	81	11	0	0	0
FDP	62	0	10	15	13	0	0	0
FDP	0	0	45	35	0	20	0	0
FDP	0	0	0	99	1	0	0	0
FDP	0	0	0	80	20	0	0	0
FDP	0	0	20	63	10	7	0	0
AQP	45	0	0	25	25	5	0	0
AQP	0	0	70	30	0	0	0	0
AQP	18	0	15	35	32	0	0	0
AQP	0	0	0	77	23	0	0	0
AQP	100	0	0	0	0	0	0	0
AQP	10	0	42	48	0	0	0	0
AQP	50	0	0	38	0	10	0	2
AQP	88	0	0	12	0	0	0	0
AQP	0	0	80	5	12	3	0	0
AQP	44	0	0	56	0	0	0	0
AQP	0	0	45	25	7	23	0	0
AQP	92	0	0	0	0	8	0	0
AQP	92	0	0	8	0	0	0	0
AQP	87	0	0	13	0	0	0	0
AQP	0	0	0	100	0	0	0	0
AQP	0	0	15	70	15	0	0	0
AQP	0	0	25	75	0	0	0	0
AQP	0	0	0	100	0	0	0	0
AQP	0	0	0	100	0	0	0	0
AQP	5	0	0	85	5	5	0	0
AQP	0	0	5	50	35	10	0	0
AQP	87	0	0	13	0	0	0	0
AQP	25	0	24	32	14	0	0	5
AQP	92	5	0	0	3	0	0	0
AQP	0	0	0	0	0	0	100	0
AQP	0	0	15	0	0	0	85	0
AQP	0	0	8	92	0	0	0	0
AQP	0	0	0	0	0	0	100	0
AQP	23	0	5	72	0	0	0	0
AQP	0	0	0	100	0	0	0	0
AQP	0	0	0	100	0	0	0	0
AQP	5	0	0	95	0	0	0	0
AQP	56	0	0	40	4	0	0	0
AQP	0	25	5	70	0	0	0	0
AQP	0	0	0	100	0	0	0	0
AQP	0	30	22	40	8	0	0	0
AQP	0	0	87	13	0	0	0	0
AQP	0	0	100	0	0	0	0	0
AQP	0	38	37	25	0	0	0	0
AQP	0	60	40	0	0	0	0	0
KLM	0	0	0	32	33	12	12	11
KLM	0	0	0	0	0	0	100	0
KLM	6	0	0	77	12	0	5	0
KLM	0	0	0	83	8	9	0	0
KLM	0	0	0	36	12	2	50	0
KLM	0	0	0	55	45	0	0	0
KLM	0	12	0	63	23	2	0	0
KLM	0	0	11	56	27	0	0	6
KLM	5	5	10	39	21	0	20	0
KLM	0	0	0	67	21	2	10	0
KLM	0	0	0	0	0	0	100	0
KLM	0	0	13	55	23	9	0	0
KLM	0	0	0	0	8	0	92	0
KLM	0	0	0	0	0	0	100	0
KLM	6	0	0	23	45	16	0	10
KLM	0	0	0	76	4	0	20	0
KLM	0	0	0	0	0	0	100	0
KLM	0	0	0	42	27	0	31	0
KLM	5	0	6	33	0	0	51	5
KLM	32	4	0	44	12	0	8	0
KLM	0	0	19	80	1	0	0	0
KLM	5	0	0	92	3	0	0	0
KLM	0	0	35	65	0	0	0	0
KLM	0	0	0	91	9	0	0	0
KLM	0	0	35	65	0	0	0	0
KLM	0	0	28	70	1	1	0	0
KLM	0	0	50	50	0	0	0	0
KLM	0	0	0	100	0	0	0	0
KLM	0	0	0	85	15	0	0	0
KLM	0	0	40	60	0	0	0	0
KLM	0	0	60	40	0	0	0	0
KLM	0	0	50	50	0	0	0	0
KLM	0	0	0	100	0	0	0	0
KLM	0	0	12	88	0	0	0	0
KLM	0	0	0	100	0	0	0	0
KLM	0	0	30	70	0	0	0	0
KLM	0	0	76	24	0	0	0	0
KLM	0	0	0	100	0	0	0	0
KLM	0	0	0	100	0	0	0	0
KLM	0	0	20	80	0	0	0	0

## Sheet: Land_cover_types
Pixel counts by cover type
ID	TREE_COVER	SHRUBLAND	GRASSLAND	CROPLAND	BUILT_UP	BARE	WATER_BODIES	WETLANDS
AQP	5244	1	1918	1	30450	31	911	55
ARQ	5116	4	4371	301	28307	238	258	17
DYX	32588	94	5084	75	717	0	0	0
DZB	28449	310	7222	5	2597	61	0	0
FDP	2532	0	2359	83	33643	0	0	0
ITZ	3834	0	794	0	33987	0	0	0
JBR	2764	0	1051	5	34763	39	0	0
KLM	8159	0	15001	464	13855	1156	0	0
LAM	11185	12	9925	27	17392	95	0	0
LHR	14963	5	8739	14	14369	532	0	0
LIB	3238	0	461	0	34908	2	0	0
MPS	24347	11	12002	71	313	514	1282	38
PCT	30255	690	4688	4	2901	102	0	0
TIX	28965	949	7651	1	1080	1	0	0
											Fig. 8 Stacked bar plot showing the pixel percentage by ground cover type of the urban natural areas studied.

## Sheet: Vegetation_in_transects
Table 1 Mean ± SD values of trunk diameter, tree height, and canopy dimensions (North-South and East-West) per site.
Urban natural area	Trunk diameter (cm)	Height (m)	Canopy N-S (m)	Canopy E-W (m)
AQP	12.07 ± 16.34	2.56 ± 2.80	3.30 ± 4.32	3.13 ± 3.87
ARQ	18.27 ± 20.93	5.76 ± 4.36	4.64 ± 3.30	4.28 ± 3.45
DYX	22.23 ± 23.38	7.58 ± 5.20	5.29 ± 3.86	5.24 ± 3.95
DZB	12.71 ± 16.98	4.06 ± 3.40	3.15 ± 3.15	2.93 ± 2.87
FDP	22.12 ± 20.68	6.13 ± 3.97	4.43 ± 3.37	4.06 ± 3.16
ITZ	12.67 ± 17.14	1.95 ± 2.18	2.18 ± 2.44	2.41 ± 2.95
JBRRO	9.20 ± 9.48	5.78 ± 5.26	3.54 ± 2.63	3.30 ± 2.62
KLM	9.56 ± 9.28	3.27 ± 2.60	2.32 ± 2.07	2.22 ± 1.92
LAM	9.18 ± 7.16	4.23 ± 2.69	3.05 ± 1.99	2.75 ± 1.78
LHR	7.84 ± 9.81	4.32 ± 4.01	2.57 ± 2.80	2.63 ± 2.71
LIB	30.52 ± 27.89	8.15 ± 5.18	5.95 ± 4.36	5.54 ± 4.18
MAPSA	7.12 ± 11.24	5.11 ± 3.63	2.67 ± 2.38	3.13 ± 2.72
PCTY	12.85 ± 20.06	3.23 ± 2.98	2.78 ± 2.71	2.55 ± 2.50
TIX	5.58 ± 8.33	1.99 ± 2.91	1.35 ± 1.96	1.29 ± 1.97

## Sheet: Flower_visitors
SPECIES	ORDER	FAMILY	COUNT (number of individuals registered)
Abaeis.boisduvaliana	LEPIDOPTERA	PIERIDAE	1
Abaeis.nicippe	LEPIDOPTERA	PIERIDAE	3
Acanthocephala.alata	HEMIPTERA	COREIDAE	2
Achalarus.mf1	LEPIDOPTERA	HESPERIIDAE	12
Acmaeodera.flavomarginata	COLEOPTERA	BUPRESTIDAE	17
Acmaeodera.setosa	COLEOPTERA	BUPRESTIDAE	11
Acromyrmex.octospinus	HYMENOPTERA	FORMICIDAE	3
Adelpha.fessonia	LEPIDOPTERA	NYMPHALIDAE	12
Adelpha.iphicleola	LEPIDOPTERA	NYMPHALIDAE	2
Aellopos.clavipes	LEPIDOPTERA	SPHINGIDAE	11
Aetole.bella	LEPIDOPTERA	HELIODINIDAE	12
Agapostemon.mf1	HYMENOPTERA	HALICTIDAE	1
Aguna.asander	LEPIDOPTERA	HESPERIIDAE	4
Aidemona.azteca	ORTHOPTERA	ACRIDIDAE	2
Alagoasa.mf1	COLEOPTERA	CHRYSOMELIDAE	0
Allograpta.mf1	DIPTERA	SYRPHIDAE	1
Alticini.mf1	COLEOPTERA	CHRYSOMELIDAE	2
Amazilia.rutila	APODIFORMES	TROCHILIDAE	55
Amazilia.yucatanensis	APODIFORMES	TROCHILIDAE	3
Amblyscirtes.tolteca	LEPIDOPTERA	HESPERIIDAE	5
Ammophila.pictipennis	HYMENOPTERA	SPHECIDAE	4
Anaea.aidea	LEPIDOPTERA	NYMPHALIDAE	7
Anartia.fatima	LEPIDOPTERA	NYMPHALIDAE	23
Anartia.jatrophae	LEPIDOPTERA	NYMPHALIDAE	5
Ancyloscelis.mf1	HYMENOPTERA	APIDAE	2
Anomalon.mf1	HYMENOPTERA	ICHNEUMONIDAE	9
Anoplius.mf1	HYMENOPTERA	POMPILIDAE	2
Anteos.maerula	LEPIDOPTERA	PIERIDAE	12
Anthanassa.tulcis	LEPIDOPTERA	NYMPHALIDAE	25
Anthomyia.mf1	DIPTERA	ANTHOMYIIDAE	1
Anthonomus.mf1	COLEOPTERA	CURCULIONIDAE	2
Anthrax.irroratus	DIPTERA	BOMBYLIIDAE	9
Antigonus.erosus	LEPIDOPTERA	HESPERIIDAE	8
Apis.mellifera	HYMENOPTERA	APIDAE	1623
Apogonalia.stalii	HEMIPTERA	CICADELLIDAE	3
Archilochus.colubris	APODIFORMES	TROCHILIDAE	11
Archytas.apicifer	DIPTERA	TACHINIDAE	1
Ascia.monuste	LEPIDOPTERA	PIERIDAE	26
Athyroglossa.mf1	DIPTERA	EPHYDRIDAE	2
Atomosia.mf1	DIPTERA	ASILIDAE	1
Augochlora.aurifera	HYMENOPTERA	HALICTIDAE	25
Augochlora.mf1	HYMENOPTERA	HALICTIDAE	39
Augochlora.nigrocyanea	HYMENOPTERA	HALICTIDAE	160
Augochloropsis.mf1	HYMENOPTERA	HALICTIDAE	5
Augochloropsis.mf2	HYMENOPTERA	HALICTIDAE	30
Autochton.caballo	LEPIDOPTERA	HESPERIIDAE	2
Autochton.potrillo	LEPIDOPTERA	HESPERIIDAE	2
Baris.mf1	COLEOPTERA	CURCULIONIDAE	1
Biblis.aganisa	LEPIDOPTERA	NYMPHALIDAE	9
Bicyrtes.variegatus	HYMENOPTERA	CRABRONIDAE	1
Brachygastra.mellifica	HYMENOPTERA	VESPIDAE	274
Brentus.anchorago	COLEOPTERA	BRENTIDAE	4
Burnsius.burnsi	LEPIDOPTERA	HESPERIIDAE	3
Burnsius.oileus	LEPIDOPTERA	HESPERIIDAE	26
Burtinus.notatipennis	HEMIPTERA	ALYDIDAE	14
Calephelis.perditalis	LEPIDOPTERA	RIODINIDAE	108
Calleida.decora	COLEOPTERA	CARABIDAE	9
Callimormus.saturnus	LEPIDOPTERA	HESPERIIDAE	14
Calliopum.mf1	DIPTERA	LAUXANIIDAE	3
Calopteron.reticulatum	COLEOPTERA	LYCIDAE	3
Calycopis.mf1	LEPIDOPTERA	LYCAENIDAE	14
Camponotus.mf1	HYMENOPTERA	FORMICIDAE	6
Camponotus.zonatus	HYMENOPTERA	FORMICIDAE	17
Camptoprosopella.mf1	DIPTERA	LAUXANIIDAE	6
Camptoprosopella.mf2	DIPTERA	LAUXANIIDAE	5
Catorhintha.selector	HEMIPTERA	COREIDAE	1
Centris.adani	HYMENOPTERA	APIDAE	7
Centris.analis	HYMENOPTERA	APIDAE	90
Centris.mf1	HYMENOPTERA	APIDAE	1
Centris.nitida	HYMENOPTERA	APIDAE	118
Centris.trigonoides	HYMENOPTERA	APIDAE	5
Cephalotes.multispinosus	HYMENOPTERA	FORMICIDAE	20
Cephalotrigona.zexmeniae	HYMENOPTERA	APIDAE	12
Ceratina.mf1	HYMENOPTERA	APIDAE	45
Ceratina.mf2	HYMENOPTERA	APIDAE	17
Ceratina.mf3	HYMENOPTERA	APIDAE	59
Cerceris.mf1	HYMENOPTERA	APIDAE	4
Cheilomenes.sexmaculata	COLEOPTERA	COCCINELLIDAE	1
Chilocorus.cacti	COLEOPTERA	COCCINELLIDAE	10
Chilocorus.nigritus	COLEOPTERA	COCCINELLIDAE	19
Chioides.albofasciatus	LEPIDOPTERA	HESPERIIDAE	5
Chiothion.georgina	LEPIDOPTERA	HESPERIIDAE	19
Chlosyne.erodyle	LEPIDOPTERA	NYMPHALIDAE	5
Chlosyne.lacinia	LEPIDOPTERA	NYMPHALIDAE	33
Chlosyne.theona	LEPIDOPTERA	NYMPHALIDAE	24
Chrysanthrax.cypris	DIPTERA	BOMBYLIIDAE	35
Chrysanthrax.edititius	DIPTERA	BOMBYLIIDAE	1
Chrysomya.megacephala	DIPTERA	CALLIPHORIDAE	13
Chrysomya.rufifacies	DIPTERA	CALLIPHORIDAE	3
Chrysotus.mf1	DIPTERA	DOLICHOPODIDAE	2
Coelioxys.mf1	HYMENOPTERA	MEGACHILIDAE	13
Coelioxys.mf2	HYMENOPTERA	MEGACHILIDAE	3
Conotelus.mf1	COLEOPTERA	NITIDULIDAE	17
Conotrachelus.seniculus	COLEOPTERA	CURCULIONIDAE	2
Copaeodes.aurantiaca	LEPIDOPTERA	HESPERIIDAE	4
Copaeodes.minima	LEPIDOPTERA	HESPERIIDAE	34
Copestylum.mexicanum	DIPTERA	SYRPHIDAE	4
Corticea.corticea	LEPIDOPTERA	HESPERIIDAE	1
Corythaica.mf1	HEMIPTERA	TINGIDAE	8
Corytucha.mf1	HEMIPTERA	TINGIDAE	4
Cryptocephalus.irroratus	COLEOPTERA	CHRYSOMELIDAE	4
Cupido.comyntas	LEPIDOPTERA	LYCAENIDAE	1
Cycloneda.sanguinea	COLEOPTERA	COCCINELLIDAE	3
Cymaenes.tripunctus	LEPIDOPTERA	HESPERIIDAE	14
Cynanthus.canivetii	APODIFORMES	TROCHILIDAE	1
Danaus.eresimus	LEPIDOPTERA	NYMPHALIDAE	16
Danaus.gilippus	LEPIDOPTERA	NYMPHALIDAE	35
Deloyala.fuliginosa	COLEOPTERA	CHRYSOMELIDAE	1
Desmemometopa.mf1	DIPTERA	MILICHIIDAE	9
Dialictus.mf1	HYMENOPTERA	HALICTIDAE	289
Diaphania.mf1	LEPIDOPTERA	CRAMBIDAE	3
Dielis.dorsata	HYMENOPTERA	SCOLIIDAE	1
Dielis.tolteca	HYMENOPTERA	SCOLIIDAE	4
Dione.vanillae	LEPIDOPTERA	NYMPHALIDAE	81
Dioprosopa.clavata	DIPTERA	SYRPHIDAE	1
Disclisioprocta.stellata	LEPIDOPTERA	GEOMETRIDAE	5
Disonycha.glabrata	COLEOPTERA	CHRYSOMELIDAE	6
Drosophila.mf1	DIPTERA	DROSOPHILIDAE	15
Drosophila.mf2	DIPTERA	DROSOPHILIDAE	1
Dryadula.phaetusa	LEPIDOPTERA	NYMPHALIDAE	10
Dryas.iulia	LEPIDOPTERA	NYMPHALIDAE	24
Dysdercus.mf1	HEMIPTERA	PHYRRHOCORIDAE	2
Dyseuaresta.mexicana	DIPTERA	TEPHRITIDAE	1
Echinargus.isola	LEPIDOPTERA	LYCAENIDAE	113
Eiphosoma.mf1	HYMENOPTERA	ICHNEUMONIDAE	9
Enicospilus.mf1	HYMENOPTERA	ICHNEUMONIDAE	4
Euglossa.mf1	HYMENOPTERA	APIDAE	34
Eulaema.polychroma	HYMENOPTERA	APIDAE	12
Eumaeus.toxea	LEPIDOPTERA	EUMAEUS	10
Eumestorus.luctuosus	COLEOPTERA	CURCULIONIDAE	3
Euptoieta.claudia	LEPIDOPTERA	NYMPHALIDAE	15
Euptoieta.hegesia	LEPIDOPTERA	NYMPHALIDAE	14
Eurema.daira	LEPIDOPTERA	PIERIDAE	22
Eurema.lisa	LEPIDOPTERA	PIERIDAE	1
Eurhinus.yucatecus	COLEOPTERA	EURHYNCHIDAE	1
Eurypepla.brevilineata	COLEOPTERA	CHRYSOMELIDAE	6
Euschistus.obscurus	HEMIPTERA	PENTATOMIDAE	11
Euschistus.tristigmus	HEMIPTERA	PENTATOMIDAE	8
Evania.appendigaster	HYMENOPTERA	EVANIIDAE	11
Evenus.regalis	LEPIDOPTERA	LYCAENIDAE	1
Exoprosopa.mf1	DIPTERA	BOMBYLIIDAE	11
Exorista.mf1	DIPTERA	TACHINIDAE	3
Florilegus.condignus	HYMENOPTERA	APIDAE	14
Formicidae.mf1	HYMENOPTERA	FORMICIDAE	334
Formicidae.mf2	HYMENOPTERA	FORMICIDAE	47
Formicidae.mf3	HYMENOPTERA	FORMICIDAE	13
Formicidae.mf4	HYMENOPTERA	FORMICIDAE	21
Frieseomelitta.nigra	HYMENOPTERA	APIDAE	786
Frigga.partensis	ARANEAE	SALTICIDAE	2
Ganyra.josephina	LEPIDOPTERA	PIERIDAE	5
Geron.mf2	DIPTERA	BOMBYLIIDAE	10
Geron.senilis	DIPTERA	BOMBYLIIDAE	112
Halictidae.mf1	HYMENOPTERA	HALICTIDAE	7
Halictidae.mf2	HYMENOPTERA	HALICTIDAE	2
Halictidae.mf3	HYMENOPTERA	HALICTIDAE	489
Halictidae.mf4	HYMENOPTERA	HALICTIDAE	234
Halictidae.mf5	HYMENOPTERA	HALICTIDAE	56
Halictidae.mf6	HYMENOPTERA	HALICTIDAE	139
Hamadryas.februa	LEPIDOPTERA	NYMPHALIDAE	8
Heliconius.charithonia	LEPIDOPTERA	NYMPHALIDAE	8
Heliopetes.laviana	LEPIDOPTERA	HESPERIIDAE	6
Heliopetes.macaria	LEPIDOPTERA	HESPERIIDAE	23
Hemiargus.cereanus	LEPIDOPTERA	LYCAENIDAE	13
Hemipenthes.lepidota	DIPTERA	BOMBYLIIDAE	1
Heraclides.rumiko	LEPIDOPTERA	PAPILIONIDAE	6
Hermetia.illucens	DIPTERA	STRATIOMYIDAE	10
Hermeuptychia.mf1	LEPIDOPTERA	NYMPHALIDAE	23
Hesperiidae.mf1	LEPIDOPTERA	HESPERIIDAE	8
Hesperiidae.mf2	LEPIDOPTERA	HESPERIIDAE	1
Hilara.mf1	DIPTERA	EMPIDIDAE	64
Hoplitimyia.mutabilis	DIPTERA	STRATIOMYIDAE	25
Horama.plumipes	LEPIDOPTERA	EREBIDAE	1
Hylephila.phyleus	LEPIDOPTERA	HESPERIIDAE	6
Hypanthidium.yucatanicum	HYMENOPTERA	MEGACHILIDAE	5
Hypselonotus.lineatus	HEMIPTERA	COREIDAE	1
Ichneumonidae.mf1	HYMENOPTERA	ICHNEUMONIDAE	4
Icterus.auratus	PASSERIFORMES	ICTERIDAE	5
Icterus.cuculatus	PASSERIFORMES	ICTERIDAE	13
Icterus.gularis	PASSERIFORMES	ICTERIDAE	1
Icterus.spurius	PASSERIFORMES	ICTERIDAE	12
Ins.celeris	DIPTERA	BOMBYLIIDAE	4
Jadera.coturnix	HEMIPTERA	RHOPALIDAE	3
Junonia.neildi	LEPIDOPTERA	NYMPHALIDAE	3
Lasioglossum.mf1	HYMENOPTERA	HALICTIDAE	10
Lauxaniidae.mf1	DIPTERA	LAUXANIIDAE	4
Lepidanthrax.mf1	DIPTERA	BOMBYLIIDAE	7
Leptoglossus.mf1	HEMIPTERA	COREIDAE	4
Leptoglossus.zonatus	HEMIPTERA	COREIDAE	4
Leptotes.cassius	LEPIDOPTERA	LYCAENIDAE	90
Lerodea.eufala	LEPIDOPTERA	HESPERIIDAE	2
Lestrimelitta.niitkib	HYMENOPTERA	DIPTERA	37
Lonchaea.mf1	DIPTERA	LONCHAEIDAE	5
Luperomorpha.mf1	COLEOPTERA	CHRYSOMELIDAE	1
Macronychini.mf1	COLEOPTERA	ELMIDAE	19
Marpesia.petreus	LEPIDOPTERA	NYMPHALIDAE	1
Megachile.albitarcis	HYMENOPTERA	MEGACHILIDAE	1
Megachile.mf1	HYMENOPTERA	MEGACHILIDAE	24
Megachile.zaptlana	HYMENOPTERA	MEGACHILIDAE	21
Megachilidae.mf1	HYMENOPTERA	MEGACHILIDAE	7
Megascelis.mf1	COLEOPTERA	CHRYSOMELIDAE	2
Melanis.pixe	LEPIDOPTERA	RIODINIDAE	10
Melipona.beecheii	HYMENOPTERA	APIDAE	46
Melissodes.tepaneca	HYMENOPTERA	APIDAE	2
Membracis.mexicana	HEMIPTERA	MEMBRACIDAE	2
Menemerus.bivittatus	ARANEAE	SALTICIDAE	1
Mestra.amymone	LEPIDOPTERA	NYMPHALIDAE	24
Microtia.elva	LEPIDOPTERA	NYMPHALIDAE	182
Misumena.vatia	ARANEAE	THOMISIDAE	1
Misumenoides.mf1	ARANEAE	THOMISIDAE	4
Mordellinae.mf1	COLEOPTERA	MORDELLIDAE	3
Murgaria.albociliatus	LEPIDOPTERA	HESPERIIDAE	21
Musca.domestica	DIPTERA	MUSCIDAE	162
Myzinum.maculatum	HYMENOPTERA	THYNNIDAE	59
Nannotrigona.periamploides	HYMENOPTERA	APIDAE	861
Nathalis.iole	LEPIDOPTERA	PIERIDAE	73
Nemognatha.mf1	COLEOPTERA	MELOIDAE	6
Neolema.mf1	COLEOPTERA	CHRYSOMELIDAE	4
Neolochmaea.mf1	COLEOPTERA	CHRYSOMELIDAE	1
Neoponera.villosa	HYMENOPTERA	FORMICIDAE	1
Netelia.mf1	HYMENOPTERA	ICHNEUMONIDAE	3
Notozona.rufofusca	COLEOPTERA	CHRYSOMELIDAE	6
Nyia.pilatei	DIPTERA	BOMBYLIIDAE	11
Nysius.mf1	HEMIPTERA	LYGAEIDAE	19
Ochrostomus.pulchelus	HEMIPTERA	LYGAEIDAE	11
Ochtera.mf1	DIPTERA	EPHYDRIDAE	2
Ocyptamus.dimidiatus	DIPTERA	SYRPHIDAE	12
Ornidia.obesa	DIPTERA	SYRPHIDAE	14
Orphulella.punctata	ORTHOPTERA	ACRIDIDAE	3
Pachodynerus.mf1	HYMENOPTERA	VESPIDAE	2
Palpada.albifrons	DIPTERA	SYRPHIDAE	4
Palpada.pusilla	DIPTERA	SYRPHIDAE	7
Palpada.vinetorum	DIPTERA	SYRPHIDAE	24
Panoquina.lucas	LEPIDOPTERA	HESPERIIDAE	5
Panoquina.ocola	LEPIDOPTERA	HESPERIIDAE	5
Parachartergus.apicalis	HYMENOPTERA	VESPIDAE	17
Paragrilus.mf1	COLEOPTERA	BUPRESTIDAE	3
Paratetrapedia.moesta	HYMENOPTERA	APIDAE	9
Partamona.bilineata	HYMENOPTERA	APIDAE	34
Pepsis.mexicana	HYMENOPTERA	POMPILIDAE	8
Peucetia.viridans	ARANEAE	OXYOPIDAE	8
Phalacridae.mf1	COLEOPTERA	PHALACRIDAE	14
Phidippus.bidentatus	ARANEAE	SALTICIDAE	1
Phoebis.agarithe	LEPIDOPTERA	PIERIDAE	34
Phoebis.marcellina	LEPIDOPTERA	PIERIDAE	35
Phoebis.mf1	LEPIDOPTERA	PIERIDAE	3
Phoebis.philea	LEPIDOPTERA	PIERIDAE	16
Phoebis.pilea	LEPIDOPTERA	PIERIDAE	3
Phoebis.sennae	LEPIDOPTERA	PIERIDAE	12
Phoebis.statira	LEPIDOPTERA	PIERIDAE	4
Phyciodes.phaon	LEPIDOPTERA	NYMPHALIDAE	16
Poecilanthrax.lucifer	DIPTERA	BOMBYLIIDAE	21
Polistes.instabilis	HYMENOPTERA	VESPIDAE	3
Polistes.stabilinus	HYMENOPTERA	VESPIDAE	3
Polybia.occidentalis	HYMENOPTERA	VESPIDAE	13
Polybia.plebeja	HYMENOPTERA	VESPIDAE	159
Polybia.rejecta	HYMENOPTERA	VESPIDAE	9
Polygonus.arizonensis	LEPIDOPTERA	HESPERIIDAE	2
Polytes.vibex	LEPIDOPTERA	HESPERIIDAE	5
Pompeius.pompeius	LEPIDOPTERA	HESPERIIDAE	5
Proxys.punctulatus	HEMIPTERA	PENTATOMIDAE	2
Psamatodes.abydata	LEPIDOPTERA	GEOMETRIDAE	4
Pseudocentron.mf1	HYMENOPTERA	MEGACHILIDAE	1
Pseudomyrmex.gracilis	HYMENOPTERA	FORMICIDAE	50
Ptiloglossa.mf1	HYMENOPTERA	COLLETIDAE	3
Pyrausta.tyralis	LEPIDOPTERA	CRAMBIDAE	3
Pyrisitia.nise	LEPIDOPTERA	PIERIDAE	54
Pyrisitia.proterpia	LEPIDOPTERA	PIERIDAE	106
Pyrisitia.westwoodii	LEPIDOPTERA	PIERIDAE	42
Sarcophaga.mf1	DIPTERA	SARCOPHAGIDAE	5
Sarcophaga.mf2	DIPTERA	SARCOPHAGIDAE	9
Scaptotrigona.pectoralis	HYMENOPTERA	APIDAE	84
Sceliphron.assimile	HYMENOPTERA	SPHECIDAE	1
Scenopinus.mf1	DIPTERA	SCENOPINIDAE	2
Schistocerca.nitens	ORTHOPTERA	CAELIFERA	1
Schistocerca.piceifrons	ORTHOPTERA	CAELIFERA	1
Sinea.diadema	HEMIPTERA	REDUVIIDAE	13
Siproeta.stelenes	LEPIDOPTERA	NYMPHALIDAE	3
Spoladea.recurvalis	LEPIDOPTERA	NYMPHALIDAE	46
Spragueia.dama	LEPIDOPTERA	NOCTUIDAE	37
Staphylus.vulgata	LEPIDOPTERA	HESPERIIDAE	1
Staphylus.yucatanus	LEPIDOPTERA	HESPERIIDAE	13
Strymon.albata	LEPIDOPTERA	LYCAENIDAE	18
Strymon.rufofusca	LEPIDOPTERA	LYCAENIDAE	18
Synapte.pecta	LEPIDOPTERA	HESPERIIDAE	1
Syntomeida.epilais	LEPIDOPTERA	EREBIDAE	3
Tettigoniidae.mf1	ORTHOPTERA	TETTIGONIIDAE	1
Thomisidae.mf1	ARANEAE	THOMISIDAE	4
Thomisidae.mf2	ARANEAE	THOMISIDAE	1
Thorybes.dorantes	LEPIDOPTERA	HESPERIIDAE	183
Timochares.ruptifasciata	LEPIDOPTERA	HESPERIIDAE	3
Tortyra.mf1	LEPIDOPTERA	CHOREUTIDAE	1
Toxomerus.politus	DIPTERA	SYRPHIDAE	6
Toxorhina.mf1	DIPTERA	LIMONIIDAE	2
Trigona.fulviventris	HYMENOPTERA	MELIPONINI	145
Trypargilum.mf1	HYMENOPTERA	CRABRONIDAE	1
Urbanus.proteus	LEPIDOPTERA	HESPERIIDAE	16
Villa.lateralis	DIPTERA	BOMBYLIIDAE	44
Xylocopa.barbatella	HYMENOPTERA	APIDAE	3
Xylocopa.fimbriata	HYMENOPTERA	APIDAE	12
Xylocopa.nautlana	HYMENOPTERA	APIDAE	20
Zaprionus.mf1	DIPTERA	DROSOPHILIDAE	4

## Sheet: Plant_species
PLANT	ORIGIN	COUNT (number of individuals registered)
Tridax.procumbens	NATIVE	120
Bidens.alba	NATIVE	86
Muntingia.calabura	NATIVE	59
Wedelia.acapulcensis	NATIVE	58
Cascabela.thevetia	NATIVE	51
Senna.racemosa	NATIVE	50
Viguiera.dentata	NATIVE	48
Cordia.dodecandra	NATIVE	38
Phyla.nodiflora	NATIVE	34
Sanvitalia.procumbens	NATIVE	33
Commelina.erecta	NATIVE	31
Caesalpinia.pulcherrima	NN	29
Parthenium.hysterophorus	NATIVE	27
Piscidia.piscipula	NATIVE	27
Pluchea.carolinensis	NATIVE	27
Ruellia.inundata	NATIVE	27
Hamelia.patens	NATIVE	26
Bougainvillea.glabra	NN	25
Delonix.regia	NN	25
Senegalia.gaumeri	NATIVE	25
Melanthera.nivea	NATIVE	24
Tecoma.stans	NATIVE	24
Ixora.coccinea	NN	23
Leucaena.leucocephala	NATIVE	23
Malvaviscus.arboreus	NATIVE	23
Asclepias.curassavica	NATIVE	22
Priva.lappulacea	NATIVE	21
Spermacoce.verticillata	NATIVE	21
Cnidoscolus.souzae	NATIVE	20
Albizia.lebbeck	NN	19
Kallstroemia.maxima	NATIVE	18
Ruellia.nudiflora	NATIVE	18
Waltheria.indica	NATIVE	18
Cnidoscolus.aconitifolius	NATIVE	17
Jacquemontia.pentanthos	NATIVE	17
Plumeria.rubra	NATIVE	17
Lantana.camara	NATIVE	16
Ludwigia.octovalvis	NATIVE	16
Salvia.coccinea	NATIVE	16
Alternanthera.flavescens	NATIVE	15
Amaranthus.spinosus	NATIVE	15
Heliotropium.angiospermum	NATIVE	14
Samanea.saman	NATIVE	14
Cenostigma.gaumeri	NATIVE	13
Nymphaea.ampla	NATIVE	13
Boerhavia.coccinea	NATIVE	12
Lysiloma.latisiliquum	NATIVE	12
Melochia.tomentosa	NATIVE	12
Moringa.oleifera	NN	12
Euphorbia.heterophylla	NATIVE	11
Bauhinia.divaricata	NATIVE	10
Sida.ciliaris	NATIVE	10
Tetramerium.nervosum	NATIVE	10
Turnera.ulmifolia	NATIVE	10
Aloysia.virgata	NN	9
Antigonon.leptopus	NATIVE	9
Guazuma.ulmifolia	NATIVE	8
Nymphaea.mexicana	NATIVE	8
Acalypha.persimilis	NATIVE	7
Bougainvillea.sp.	NN	7
Euphorbia.hypericifolia	NATIVE	7
Portulaca.oleracea	NN	7
Rivina.humilis	NATIVE	7
Senna.atomaria	NATIVE	7
Boerhavia.erecta	NATIVE	6
Caesalpinia.gaumeri	NATIVE	6
Ceiba.pentandra	NATIVE	6
Chromolaena.odorata	NATIVE	6
Croton.cortesianus	NATIVE	6
Hibiscus.poeppigii	NATIVE	6
Ipomoea.nil	NATIVE	6
Lantana.canescens	NATIVE	6
Melothria.pendula	NATIVE	6
Mimosa.bahamensis	NATIVE	6
Murraya.paniculata	NN	6
Psittacanthus.calyculatus	NATIVE	6
Ruellia.blechum	NATIVE	6
Solanum.houstonii	NATIVE	6
Ageratum.gaumeri	NATIVE	5
Azadirachta.indica	NN	5
Cleome.viscosa	NN	5
Cordia.sebestena	NATIVE	5
Distimake.aegyptius	NATIVE	5
Gymnopodium.floribundum	NATIVE	5
Hydrocotyle.verticillata	NATIVE	5
Oxalis.frutescens	NATIVE	5
Sclerocarpus.divaricatus	NATIVE	5
Tradescantia.pallida	NATIVE	5
Waltheria.indica	NATIVE	5
Convolvulus.nodiflorus	NATIVE	4
Croton.humilis	NATIVE	4
Cyperus.rotundus	NN	4
Diphysa.yucatanensis	NATIVE	4
Ipomoea.hederifolia	NATIVE	4
Ipomoea.triloba	NATIVE	4
Tithonia.rotundifolia	NATIVE	4
Tradescantia.spathacea	NATIVE	4
Ziziphus.mauritiana	NN	4
Acalypha.alopecuroidea	NATIVE	3
Calotropis.procera	NN	3
Coccoloba.uvifera	NATIVE	3
Cochlospermum.vitifolium	NATIVE	3
Cyanthillium.cinereum	NN	3
Ehretia.tinifolia	NATIVE	3
Euphorbia.hirta	NATIVE	3
Gronovia.scandens	NATIVE	3
Ipomoea.crinicalyx	NATIVE	3
Petiveria.alliacea	NATIVE	3
Piper.auritum	NATIVE	3
Ricinus.communis	NN	3
Solanum.erianthum	NATIVE	3
Stachytarpheta.jamaicensis	NATIVE	3
Tabebuia.rosea	NATIVE	3
Vachellia.cornigera	NATIVE	3
Zephyranthes.citrina	NATIVE	3
Amaranthus.sp.	NATIVE	2
Argemone.mexicana	NATIVE	2
Bacopa.monnieri	NN	2
Bauhinia.divaricata	NN	2
Callicarpa.acuminata	NATIVE	2
Callisia.fragrans	NATIVE	2
Calyptocarpus.vialis	NATIVE	2
Catharanthus.roseus	NN	2
Colubrina.yucatanensis	NATIVE	2
Corchorus.siliquosus	NATIVE	2
Crateva.tapia	NATIVE	2
Dictyanthus.aeneus	NATIVE	2
Distimake.dissectus	NATIVE	2
Duranta.erecta	NATIVE	2
Euploca.humilis	NATIVE	2
Euploca.procumbens	NATIVE	2
Ipomoea.carnea	NATIVE	2
Lippia.graveolens	NATIVE	2
Lonchocarpus.punctatus	NATIVE	2
Mentzelia.aspera	NATIVE	2
Morinda.royoc	NATIVE	2
Nymphaea.elegans	NATIVE	2
Pluchea.odorata	NATIVE	2
Porophyllum.punctatum	NATIVE	2
Pseudobombax.ellipticum	NATIVE	2
Senna.alata	NATIVE	2
Vachellia.collinsii	NATIVE	2
Vachellia.pennatula	NATIVE	2
Acalypha.sp	NATIVE	1
Aphelandra.scabra	NATIVE	1
Astraea.lobata	NATIVE	1
Bonellia.macrocarpa	NATIVE	1
Bouchea.prismatica	NATIVE	1
Bursera.simaruba	NATIVE	1
Caesalpinia.yucatanensis	NATIVE	1
Capraria.biflora	NATIVE	1
Capraria.frutescens	NATIVE	1
Carica.papaya	NATIVE	1
Cascabela.gaumeri	NATIVE	1
Casearia.yucatanensis	NATIVE	1
Cassia.fistula	NN	1
Ceiba.schottii	NATIVE	1
Centrosema.virginianum	NATIVE	1
Chioccoca.alba	NATIVE	1
Chloroleucon.mangense	NATIVE	1
Citrus.limon	NN	1
Cosmos.sulphureus	NATIVE	1
Coulteria.mollis	NATIVE	1
Desmodium.incanum	NATIVE	1
Desmodium.scorpiurus	NATIVE	1
Dicliptera.sexangularis	NATIVE	1
Dracaena.hyacinthoides	NN	1
Dracaena.trifasciata	NN	1
Eclipta.prostrata	NN	1
Euphorbia.lasiocarpa	NATIVE	1
Euphorbia.ophthalmica	NATIVE	1
Guaiacum.sanctum	NATIVE	1
Hibiscus.archeri	NATIVE	1
Hibiscus.rosasinensis	NN	1
Jacquemontia.evolvuloides	NATIVE	1
Kalanchoe.laetivirens	NN	1
Launaea.intybacea	NATIVE	1
Malpighia.lundellii	NATIVE	1
Malvastrum.coromandelianum	NATIVE	1
Merremia.aegyptia	NATIVE	1
Milleria.quinqueflora	NATIVE	1
Mimosa.pudica	NATIVE	1
Morinda.citrifolia	NN	1
Myriopus.volubilis	NATIVE	1
Neomillspaughia.emarginata	NATIVE	1
Passiflora.ciliata	NATIVE	1
Pasto.noID	NATIVE	1
Peltophorum.pterocarpum	NN	1
Pisonia.aculeata	NATIVE	1
Pithecellobium.unguiscati	NATIVE	1
Sagittaria.latifolia	NATIVE	1
Salvia.misella	NATIVE	1
Salvia.occidentalis	NATIVE	1
Senna.uniflora	NATIVE	1
Senna.villosa	NATIVE	1
Sida.acuta	NATIVE	1
Solanum.hirtum	NATIVE	1
Synedrella.nodiflora	NATIVE	1
Tamarindus.indica	NN	1
Trixis.inula	NATIVE	1
Urvillea.ulmacea	NATIVE	1
Varronia.curassavica	NATIVE	1
Vitex.gaumeri	NATIVE	1
Zapoteca.formosa	NATIVE	1

## Sheet: Models_summary
Summaries for models corresponding to richness (q=0), Shannon (q=1) and dominance (q=3).
Variable names correspond as such:
SA_VEG = Vegetation structure complexity calculated through surface roughness
SA_NEST= Ground cover complexity calculated through surface roughness
PC1= Land cover PC1 - impervious surface gradient
PC2= Land cover PC2 - Vegetation type (by height) gradient
PC3= Land Cover PC3 = Water body gradient
P_SHANNON= Plant Shannon diversity at site
V_RICHNESS/SHANNON/SIMPSON= Visitor diversity calculated through inext (q=0/1/2)
SITE depicts the number of times each UNA was visited
------------------------------------------------------- MODEL: Richness ----------------------------------------------------------------------------------
Family: nbinom2 ( log )
Formula:
V_RICHNESS ~ SA_VEG + SA_NEST + PC1 + PC2 + PC3 + P_SHANNON +
(1 | SITE)
Data: df
AIC BIC logLik deviance df.resid
778.3 802.7 -380.1 760.3 103
Random effects:
Conditional model:
Groups Name Variance Std.Dev.
SITE (Intercept) 9.517e-11 9.756e-06
Number of obs: 112, groups: SITE, 14
Dispersion parameter for nbinom2 family (): 13.7
Conditional model:
Estimate Std. Error z value Pr(>|z|)
(Intercept) 3.04982 0.03284 92.88 < 2e-16 ***
SA_VEG -0.05361 0.05278 -1.02 0.30974
SA_NEST 0.01053 0.06560 0.16 0.87250
PC1 0.01328 0.04863 0.27 0.78471
PC2 -0.10589 0.04076 -2.60 0.00938 **
PC3 0.05235 0.04333 1.21 0.22698
P_SHANNON 0.14652 0.06165 2.38 0.01748 *
---
Signif. codes: 0 ‘***’ 0.001 ‘**’ 0.01 ‘*’ 0.05 ‘.’ 0.1 ‘ ’ 1
------------------------------------------------------- MODEL: Shannon ----------------------------------------------------------------------------------
Family: nbinom2 ( log )
Formula:
V_SHANNON ~ SA_VEG + SA_NEST + PC1 + PC2 + PC3 + P_SHANNON +
(1 | SITE)
Data: df
AIC BIC logLik deviance df.resid
710.6 735.1 -346.3 692.6 103
Random effects:
Conditional model:
Groups Name Variance Std.Dev.
SITE (Intercept) 1.675e-10 1.294e-05
Number of obs: 112, groups: SITE, 14
Dispersion parameter for nbinom2 family (): 11.4
Conditional model:
Estimate Std. Error z value Pr(>|z|)
(Intercept) 2.609345 0.038031 68.61 <2e-16 ***
SA_VEG 0.013920 0.060877 0.23 0.8191
SA_NEST -0.034984 0.075135 -0.47 0.6415
PC1 -0.022210 0.056492 -0.39 0.6942
PC2 -0.115165 0.047251 -2.44 0.0148 *
PC3 -0.006795 0.050288 -0.14 0.8925
P_SHANNON 0.094825 0.070427 1.35 0.1782
---
Signif. codes: 0 ‘***’ 0.001 ‘**’ 0.01 ‘*’ 0.05 ‘.’ 0.1 ‘ ’ 1
------------------------------------------------------- MODEL: Simpson ----------------------------------------------------------------------------------
Family: nbinom2 ( log )
Formula:
V_SIMPSON ~ SA_VEG + SA_NEST + PC1 + PC2 + PC3 + P_SHANNON +
(1 | SITE)
Data: df
AIC BIC logLik deviance df.resid
651.9 676.4 -317.0 633.9 103
Random effects:
Conditional model:
Groups Name Variance Std.Dev.
SITE (Intercept) 1.269e-10 1.126e-05
Number of obs: 112, groups: SITE, 14
Dispersion parameter for nbinom2 family (): 11.5
Conditional model:
Estimate Std. Error z value Pr(>|z|)
(Intercept) 2.27767 0.04131 55.14 <2e-16 ***
SA_VEG 0.05846 0.06576 0.89 0.3741
SA_NEST -0.06066 0.08105 -0.75 0.4542
PC1 -0.02704 0.06131 -0.44 0.6592
PC2 -0.11786 0.05135 -2.30 0.0217 *
PC3 -0.05645 0.05466 -1.03 0.3017
P_SHANNON 0.06639 0.07555 0.88 0.3795
---
Signif. codes: 0 ‘***’ 0.001 ‘**’ 0.01 ‘*’ 0.05 ‘.’ 0.1 ‘ ’ 1
